# Supplementary material for: Deep Chemical and Physico-Chemical Characterization of Antifungal Industrial Chitosans—Biocontrol Applications
Source: MDPI journal article supplement (doi:10.3390/molecules28030966), 2023-01-18
Supplement: s1 [file s1]

## Supplementary information

# Deep chemical and physico-chemical characterization of antifungal industrial chitosans - Biocontrol applications

Gaël Huet, Yunhui Wang, Christian Gardrat, Daphnée Brulé, Amélie Vax, Cédric Le Coz, Frédérique Pichavant, Silvère Bonnet, Benoit Poinssot and Véronique Coma \*

\*Corresponding author

[\\*Correspondence: veronique.coma@u-bordeaux.fr \(V.C.\)](mailto:veronique.coma@u-bordeaux.fr)

## Table of contents

|                            |    |
|----------------------------|----|
| <sup>1</sup> H NMR : ..... | 2  |
| SEC MALS.....              | 12 |
| XPS.....                   | 13 |
| TGA.....                   | 16 |
| Electrospray .....         | 21 |
| MALDI-TOF .....            | 22 |
| Pyrogram .....             | 23 |
| Bioactivity .....          | 25 |

$^1\text{H}$  NMR :

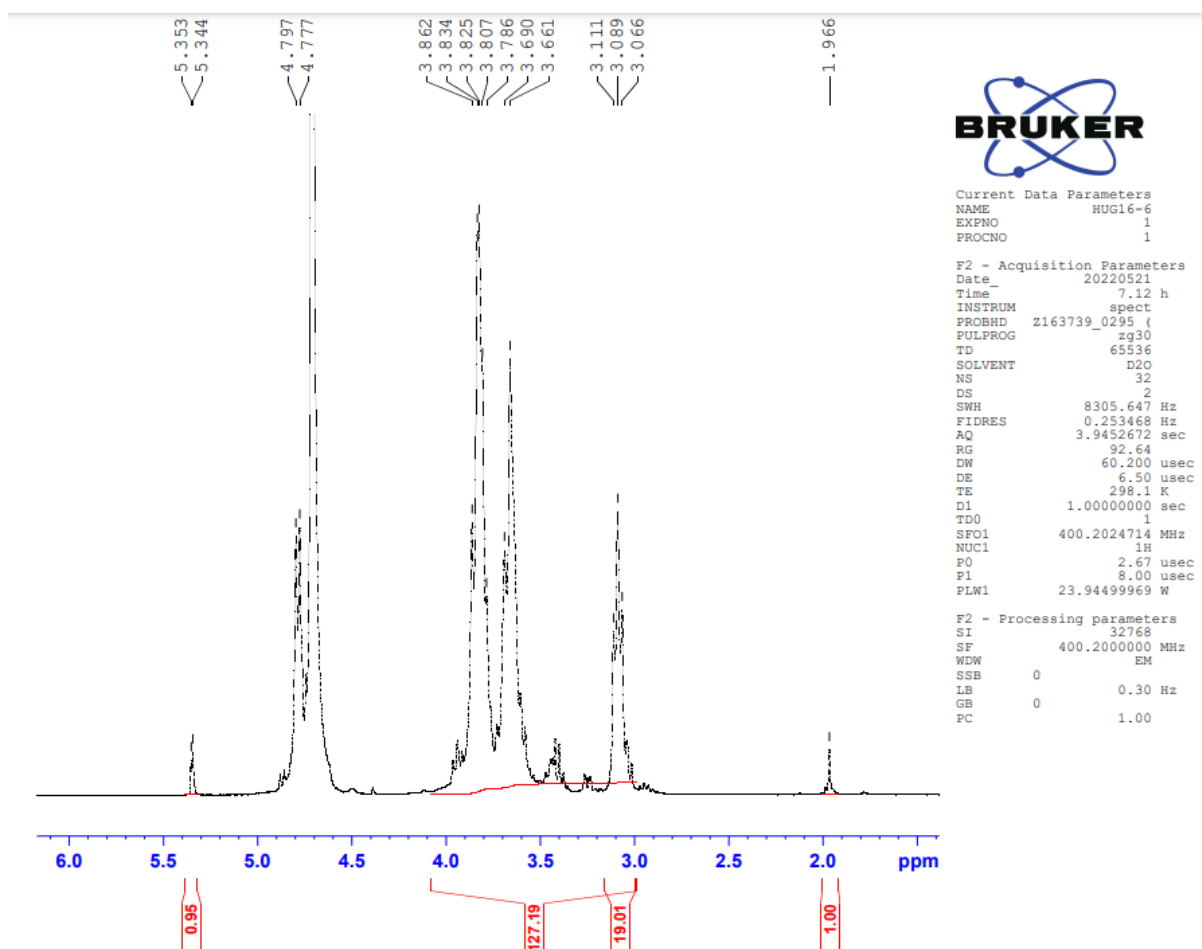

Figure S1 : Liquid-state  $^1\text{H}$  NMR spectrum of CHI-1 : DA = 98%.

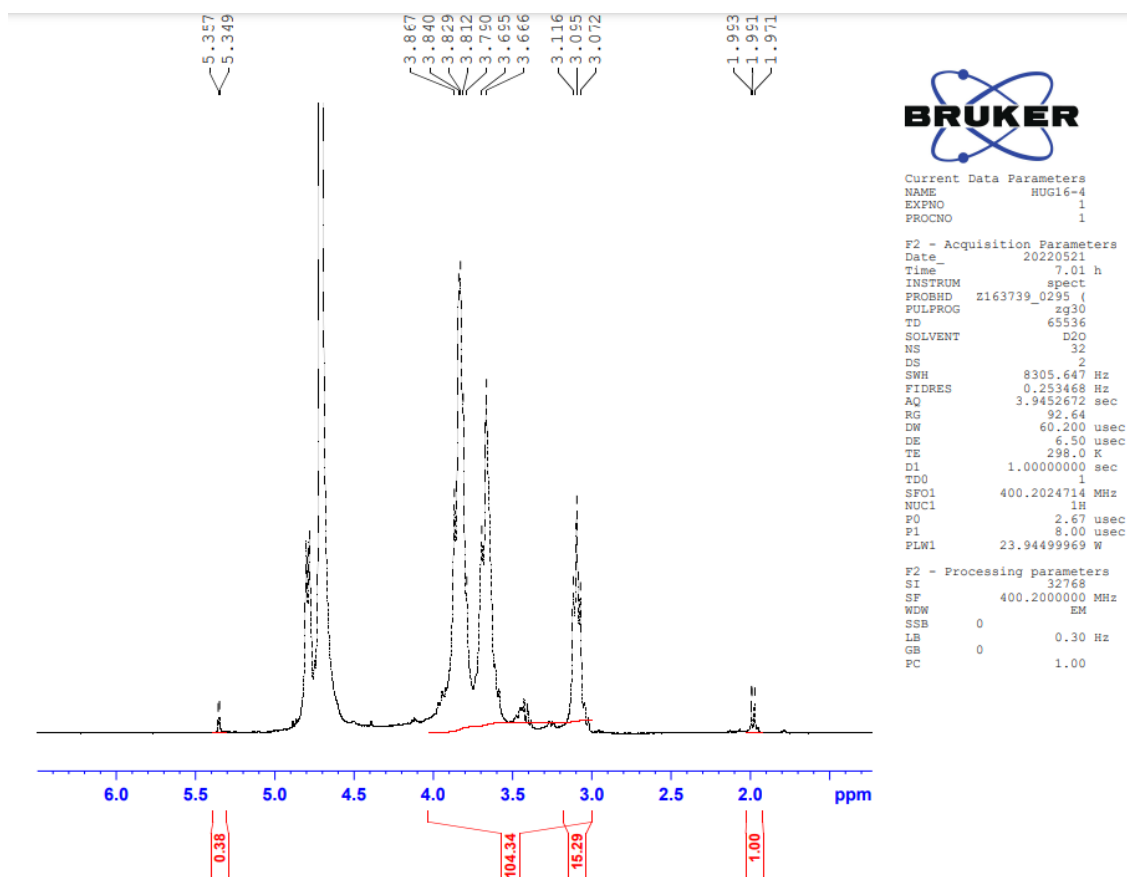

Figure S2 : Liquid-state <sup>1</sup>H NMR spectrum of CHI-2 : DA = 98%.

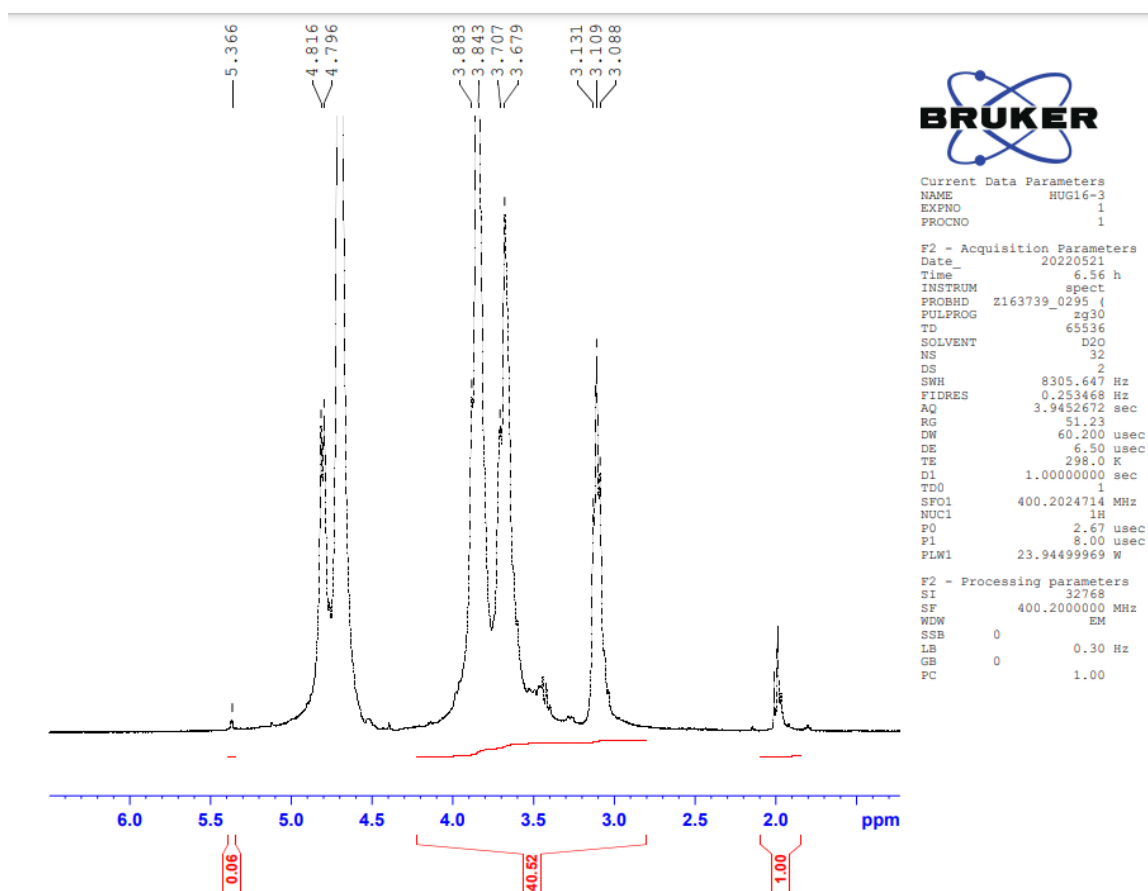

Figure S3 : Liquid-state  $^1\text{H}$  NMR spectrum of CHI-3 : DA = 95%.

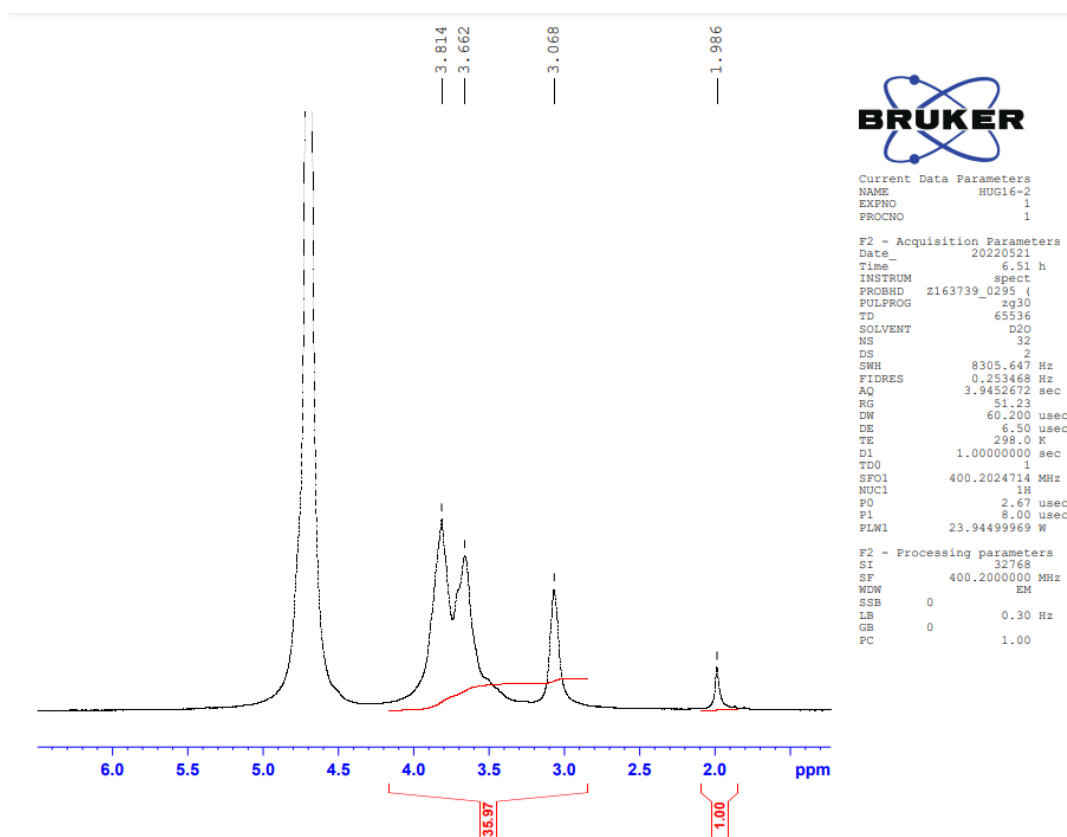

Figure S4 : Liquid-state  $^1\text{H}$  NMR spectrum of CHI-4 : DA = 94%.

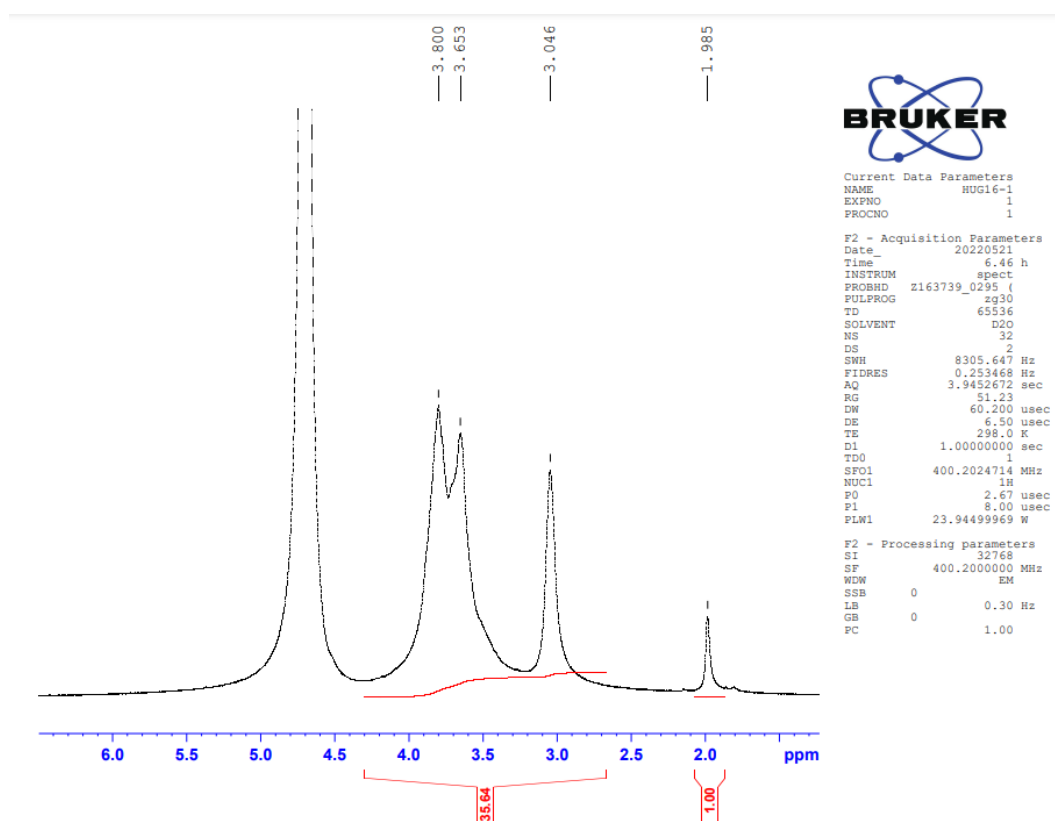

Figure S5 : Liquid-state  $^1\text{H}$  NMR Spectrum of CHI-5 : DA = 93%.

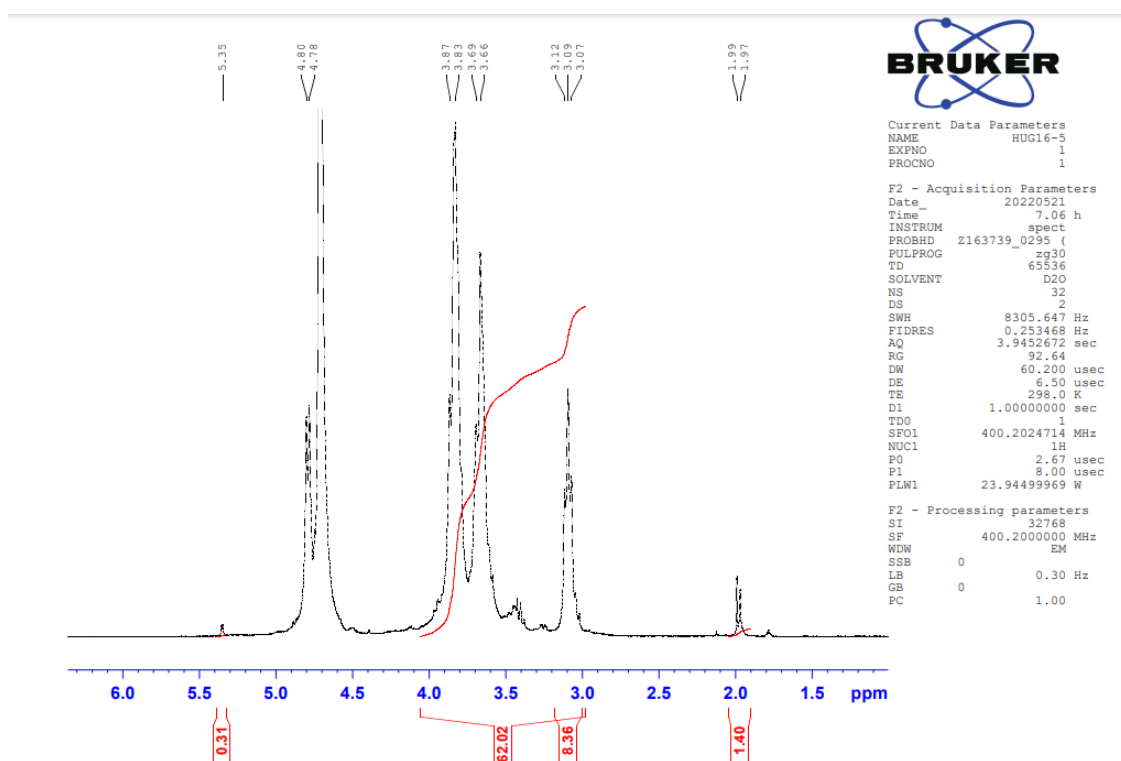

Figure S6 : Liquid-state  $^1\text{H}$  NMR Spectrum of a DP50 chitosan at Room temperature and solubilized overnight : DP = 54

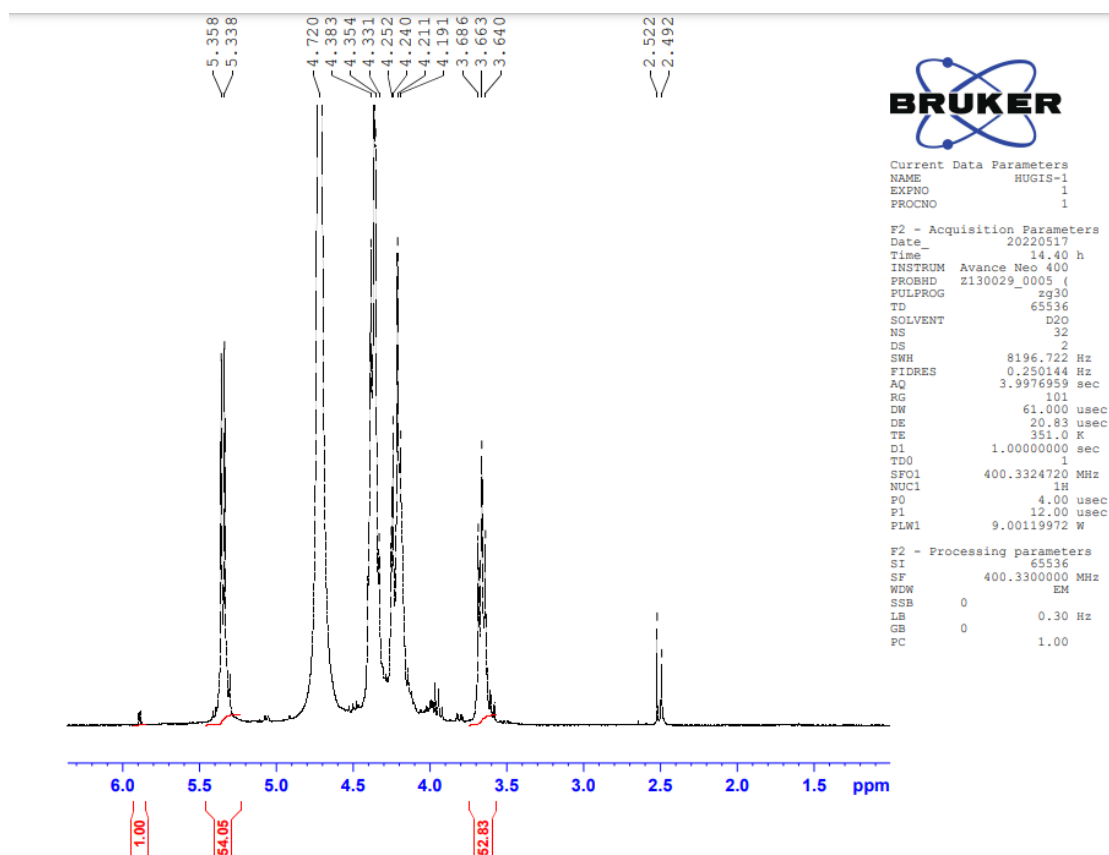

Figure S7 : Liquid-state  $^1\text{H}$  NMR Spectrum of a DP50 chitosan at  $80^\circ\text{C}$  and solubilized for 6h and stabilized for 20 minutes : DP = 54



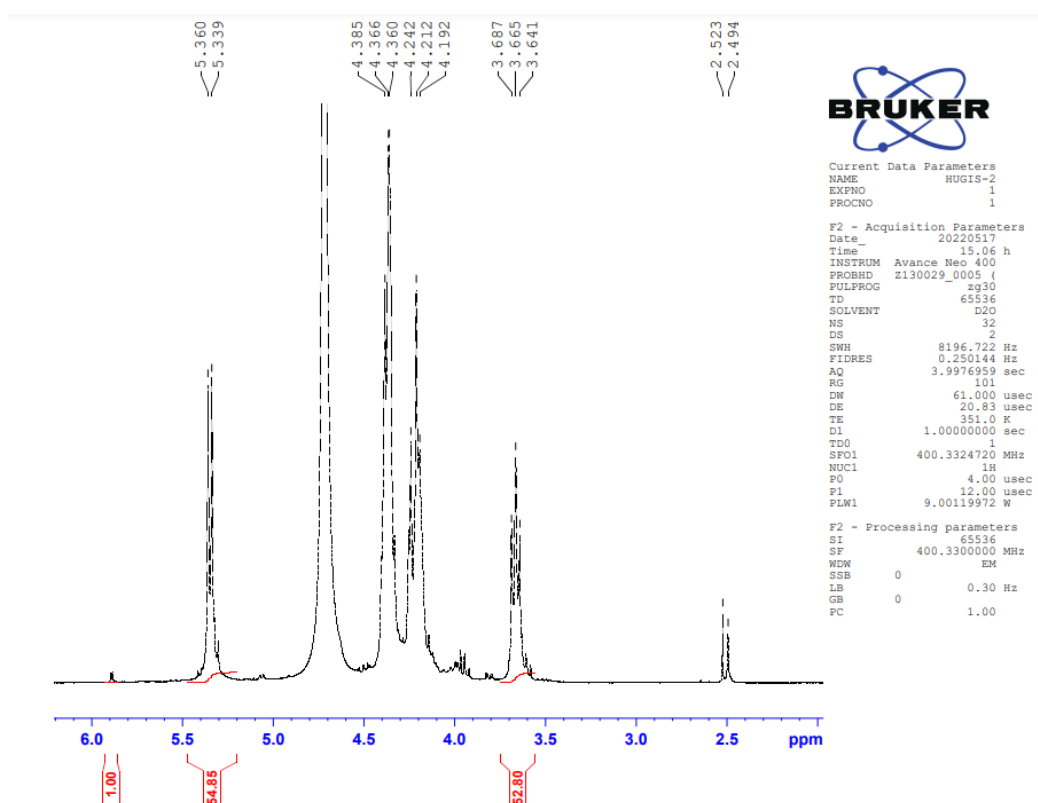

Figure S8 : Liquid-state  $^1\text{H}$  NMR Spectrum of a DP50 chitosan at  $80^\circ\text{C}$  and solubilized overnight and stabilized for 20 minutes : DP = 54

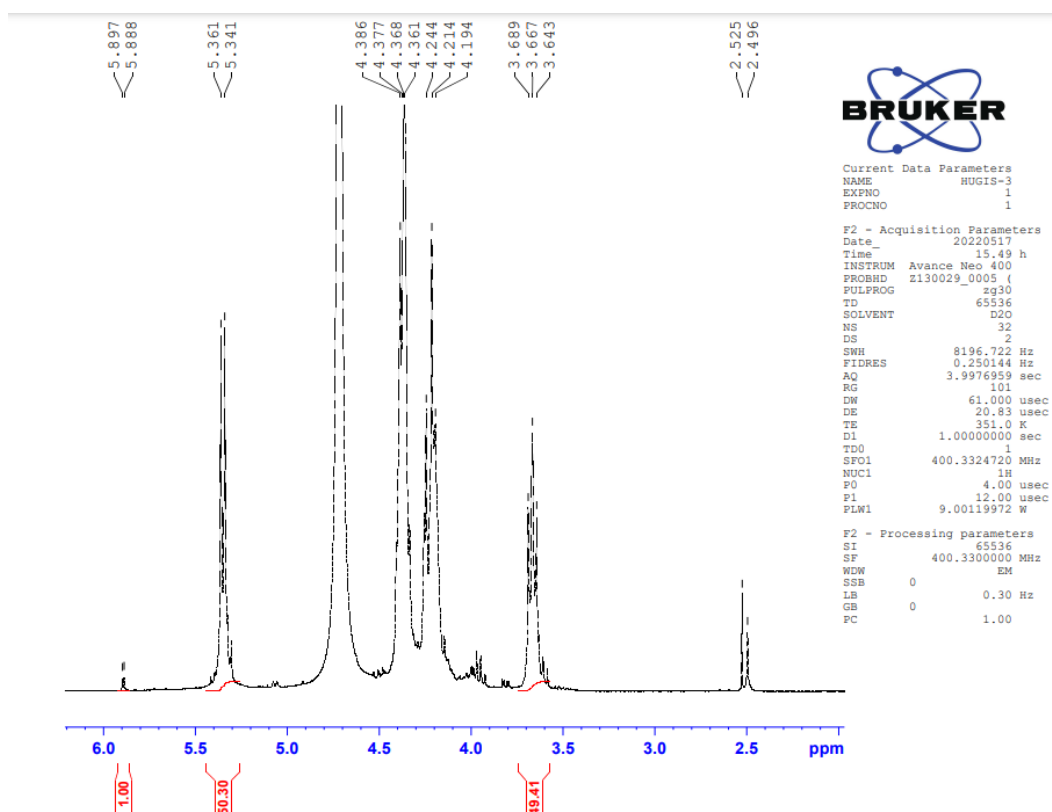

Figure S9 : Liquid-state  $^1\text{H}$  NMR Spectrum of a DP50 chitosan at  $80^\circ\text{C}$  and solubilized overnight and stabilized for 40 minutes : DP = 50

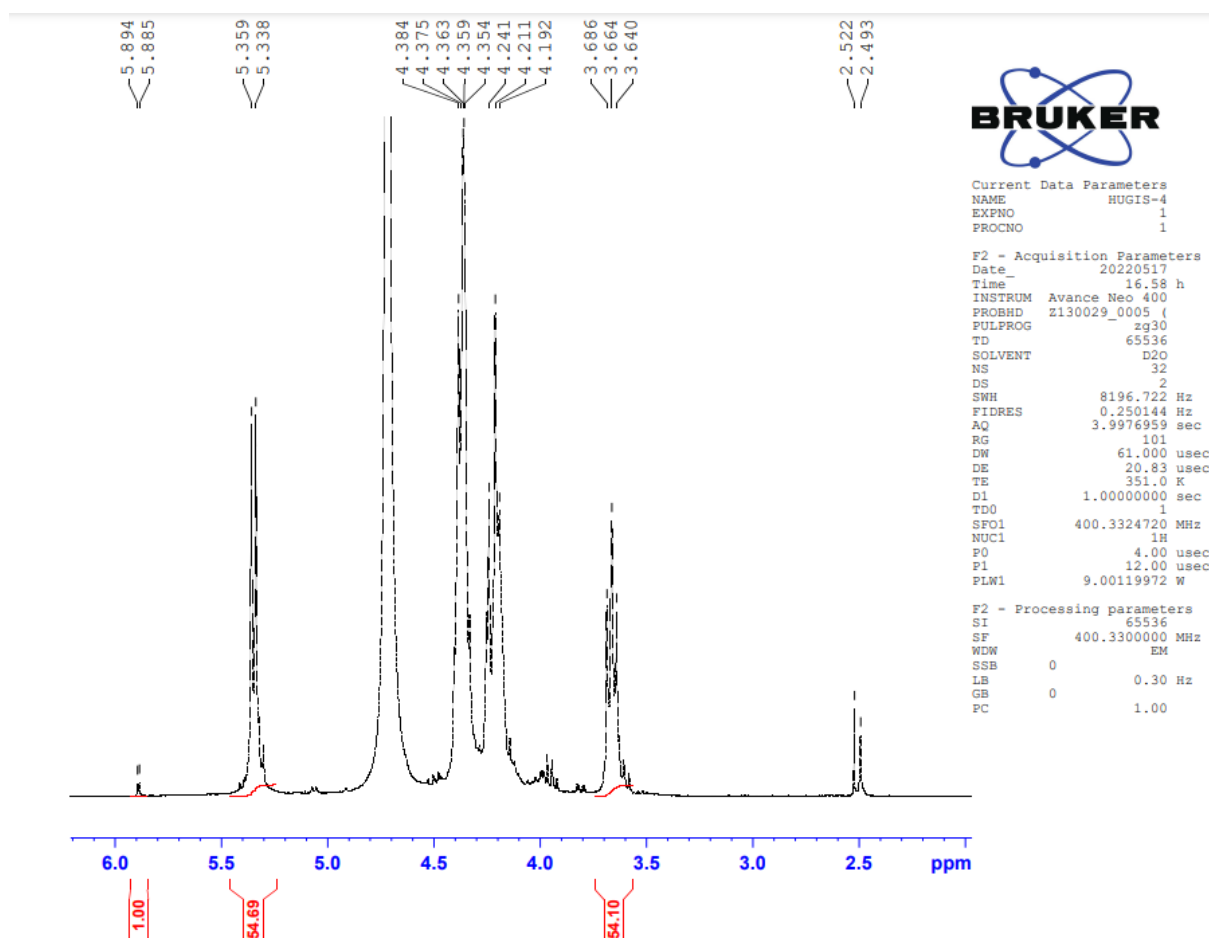

Figure S10 : Liquid-state  $^1\text{H}$  NMR Spectrum of a DP50 chitosan at  $80^\circ\text{C}$  and solubilized overnight and stabilized for 60 minutes : DP = 54

## SEC MALS

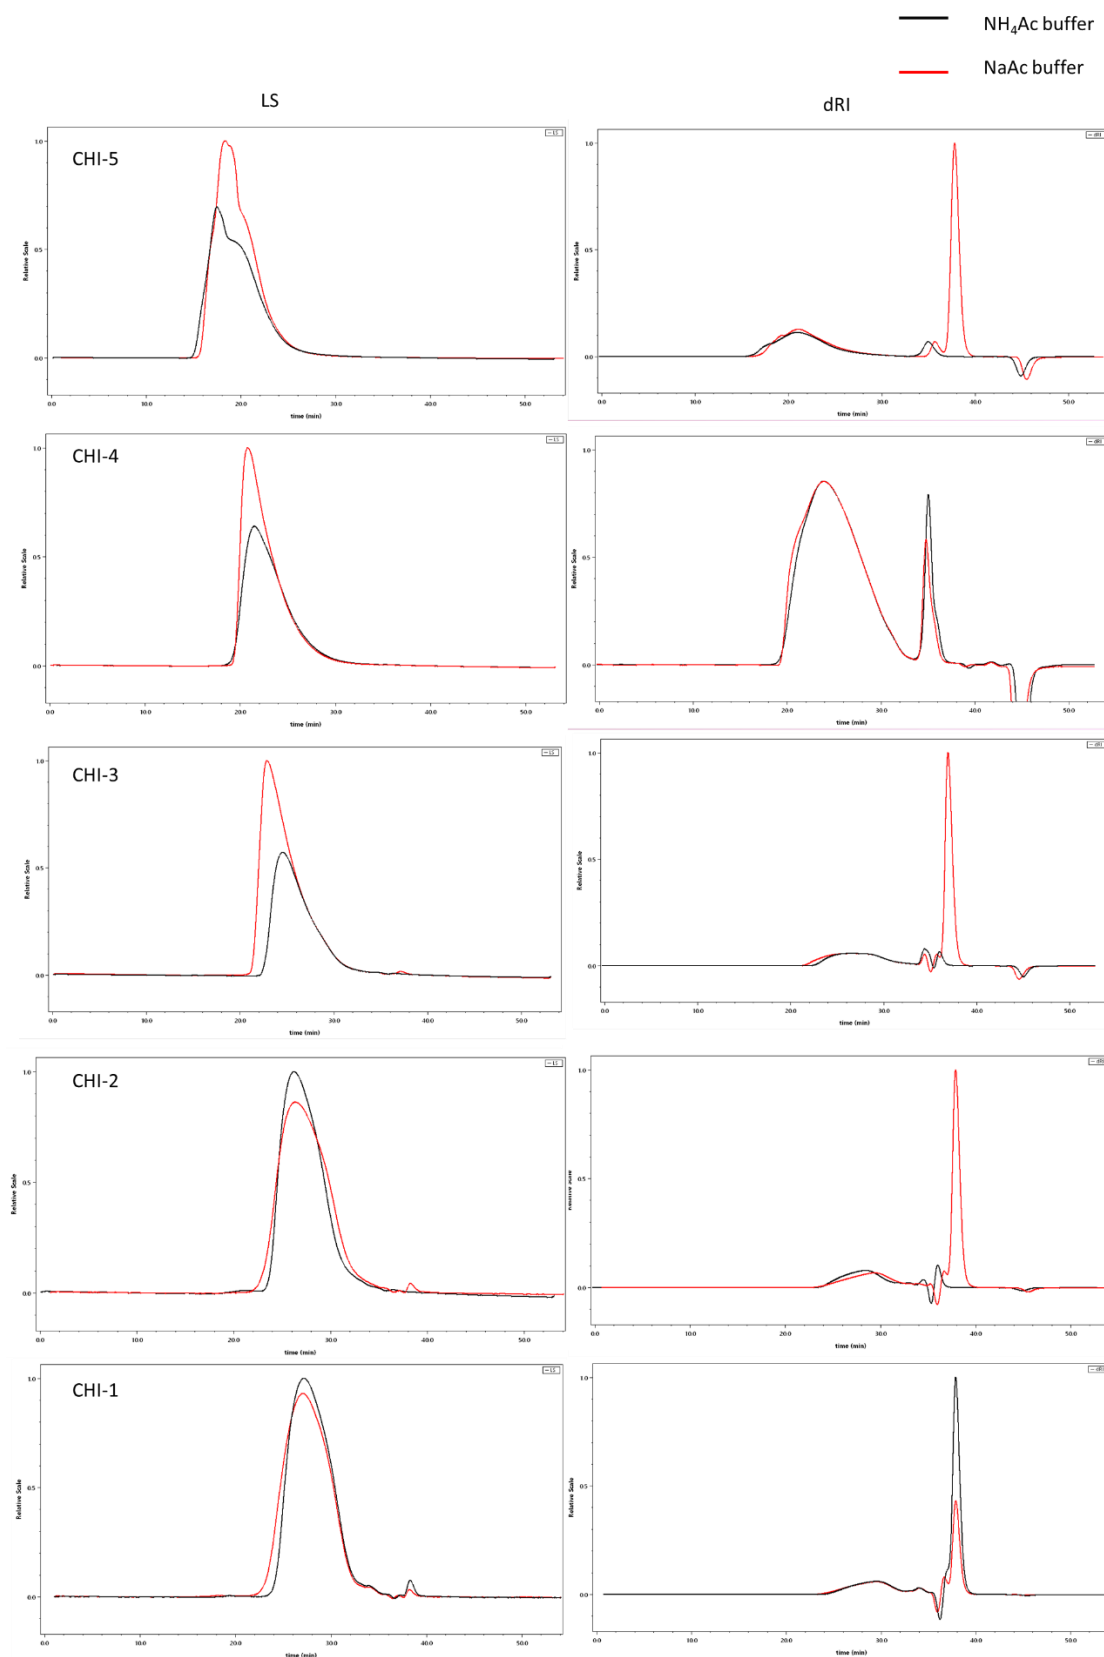

Figure S11 : SEC MALS chromatograms for CHI-1, CHI-2, CHI-3, CHI-4 and CHI-5 on two G4000PWXL and G3000PWXL gel columns in NH<sub>4</sub>Ac buffer (black) and NaAc buffer (red). The black and red curves are LS (90° angle) and dRI responses, respectively.

| Echantillon | dn/dc          |                  |
|-------------|----------------|------------------|
|             | Sodium acetate | Ammonium acetate |
| CHI-5       | 0.1742         | 0.1808           |
| CHI-4       | 0.1727         | 0.1844           |
| CHI-3       | 0.1609         | 0.1711           |
| CHI-2       | NA             | 0.1763           |
| CHI-1       | 0.1677         | 0.1663           |

Table S1 : dn/dc determined for the different chitosans in sodium acetate buffer and ammonium acetate buffer.

## XPS

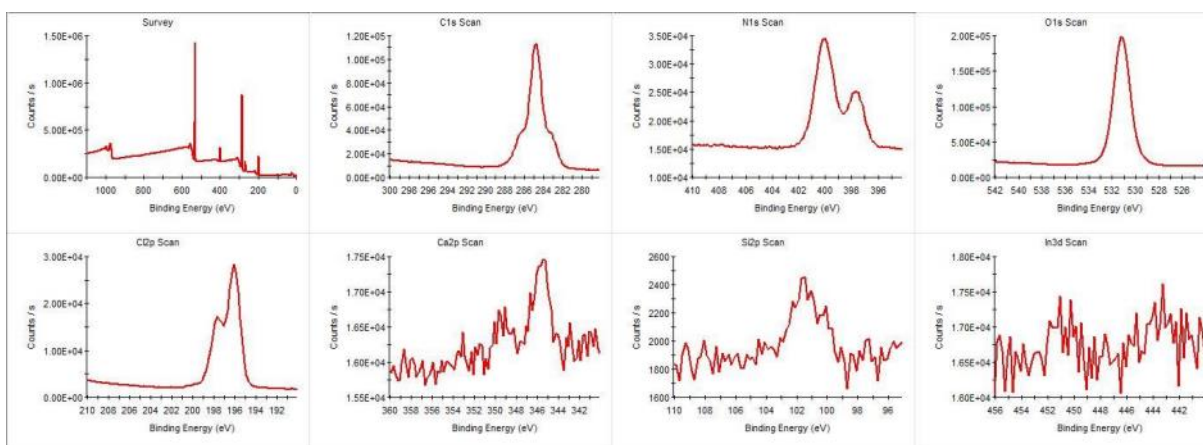

Figure S12 : XPS results from CHI-1.

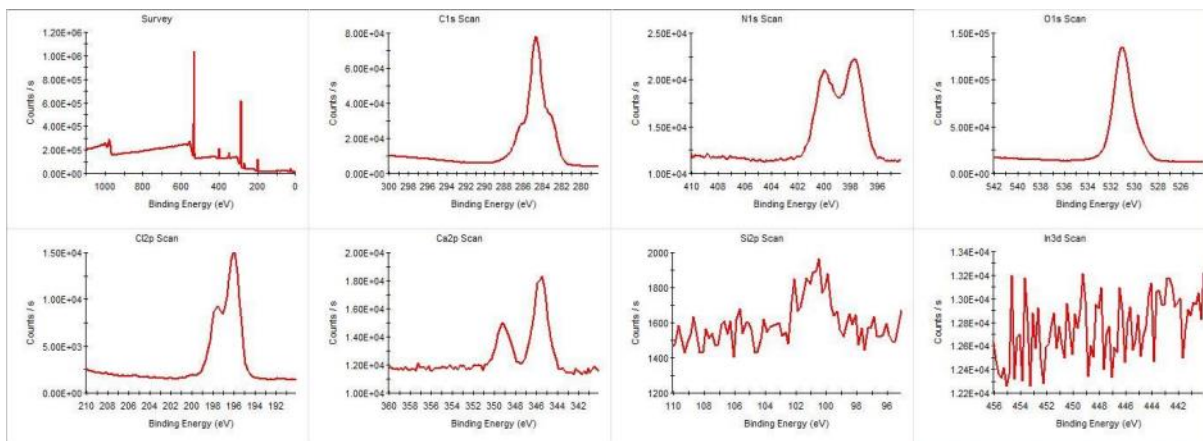

Figure S13 : XPS results from CHI-2.

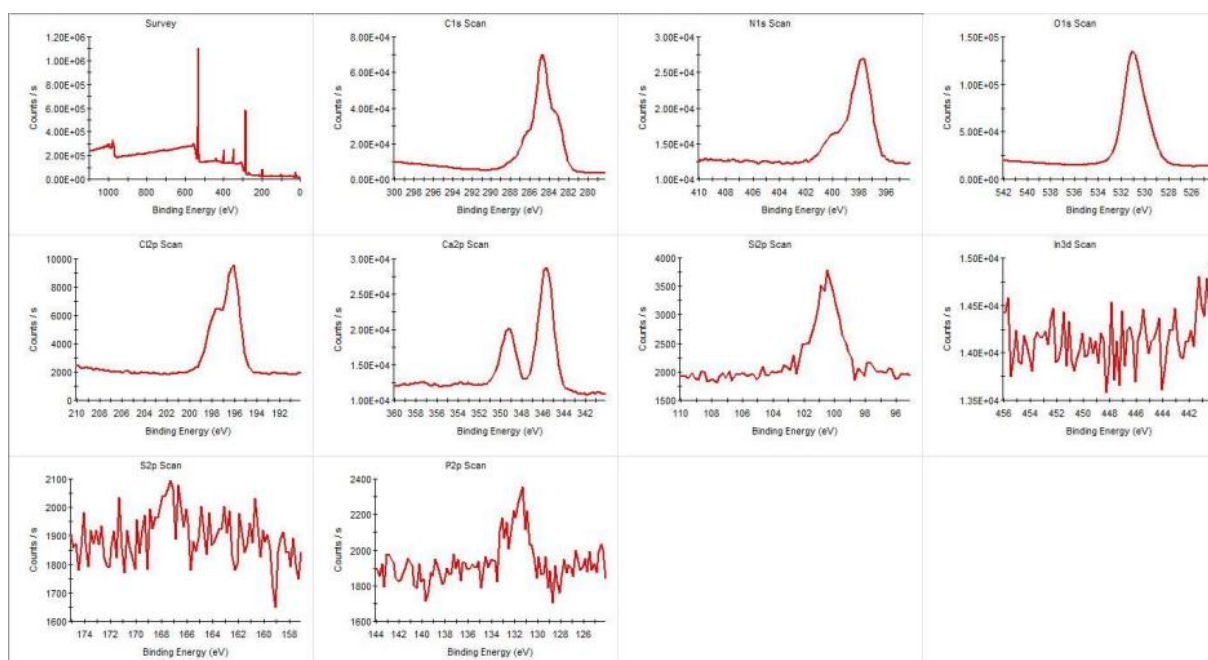

Figure S14: XPS results from CHI-3.

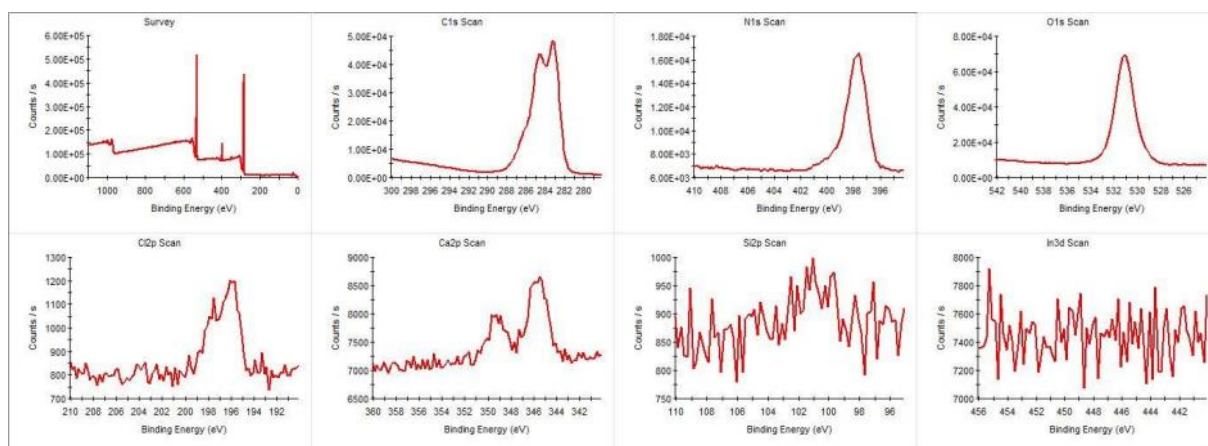

Figure S15 : XPS results from CHI-4.

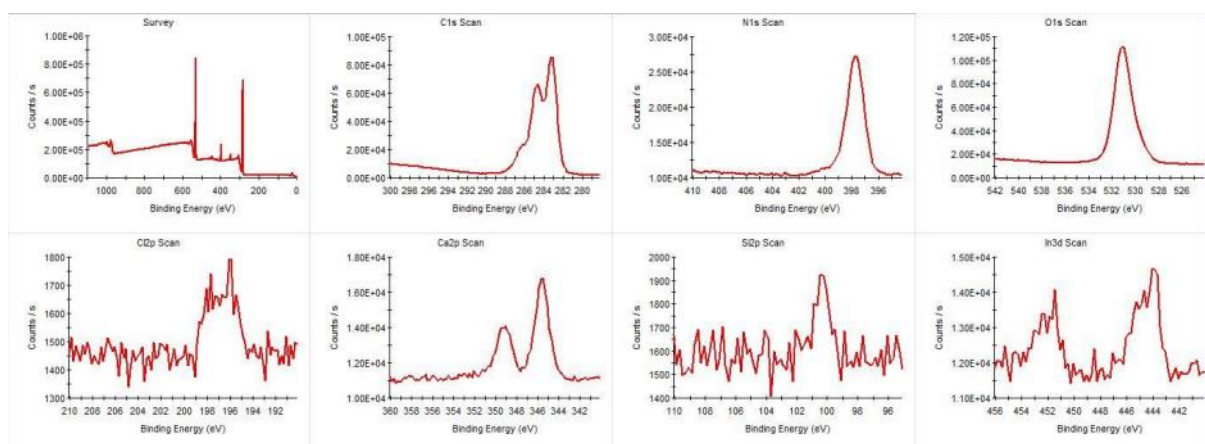

Figure S16 : XPS results from CHI-5.

## TGA

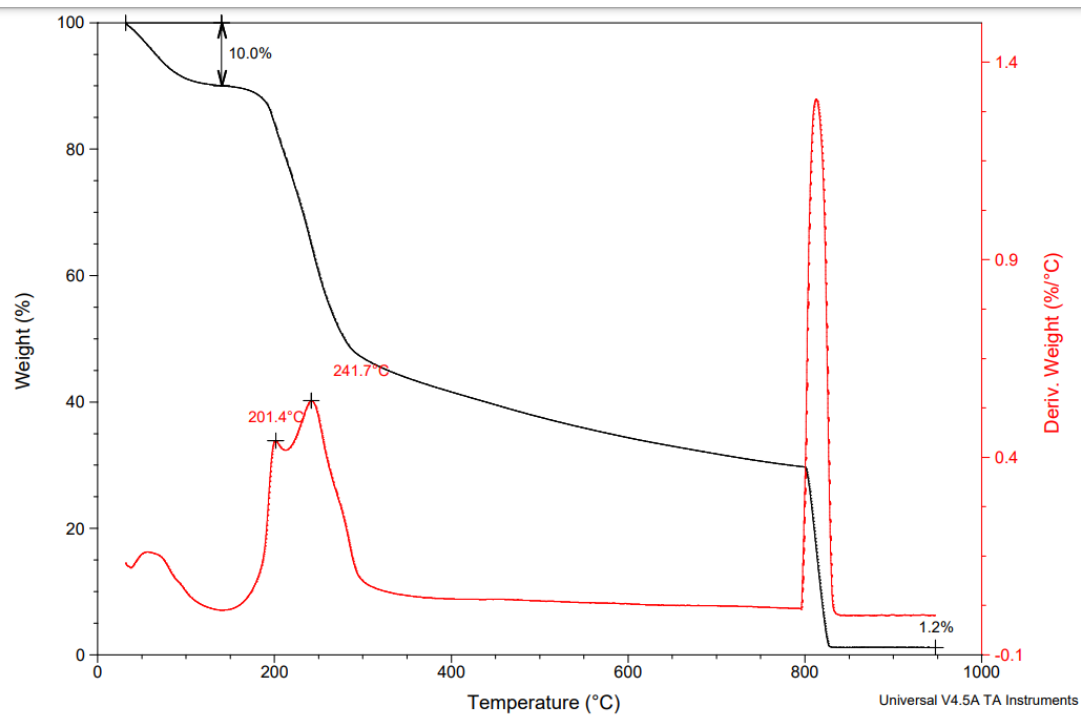

Figure S17 : Thermogravimetric and differential thermal analysis of under nitrogen (till 800°C) then air (800-950°C) of CHI-1.



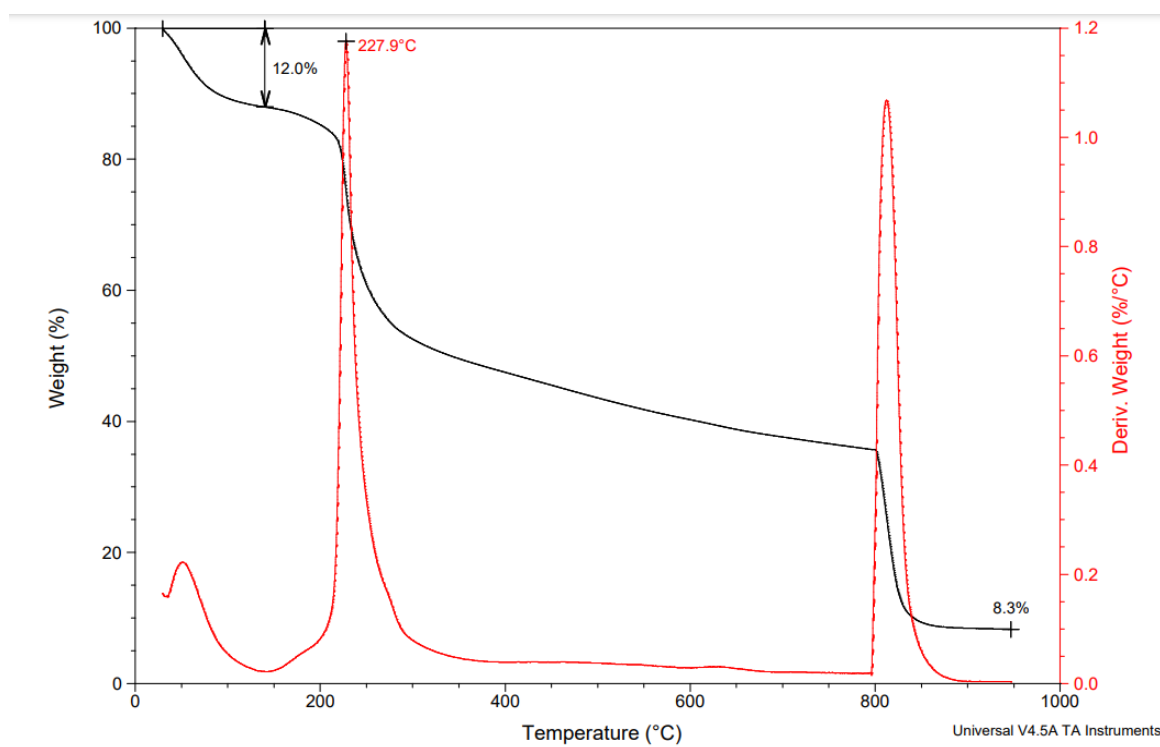

Figure S18 : Thermogravimetric and differential thermal analysis of under nitrogen (till 800°C) then air (800-950°C) of CHI-2.

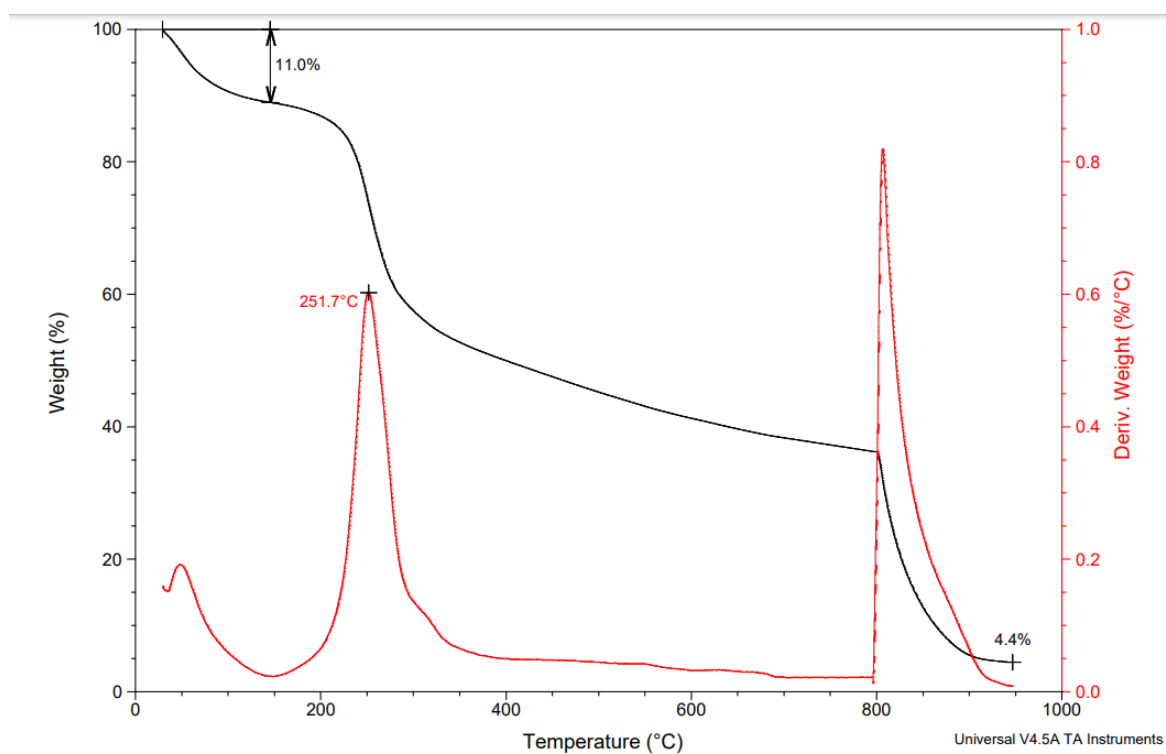

Figure S19 : Thermogravimetric and differential thermal analysis of under nitrogen (till 800°C) then air (800-950°C) of CHI-3.

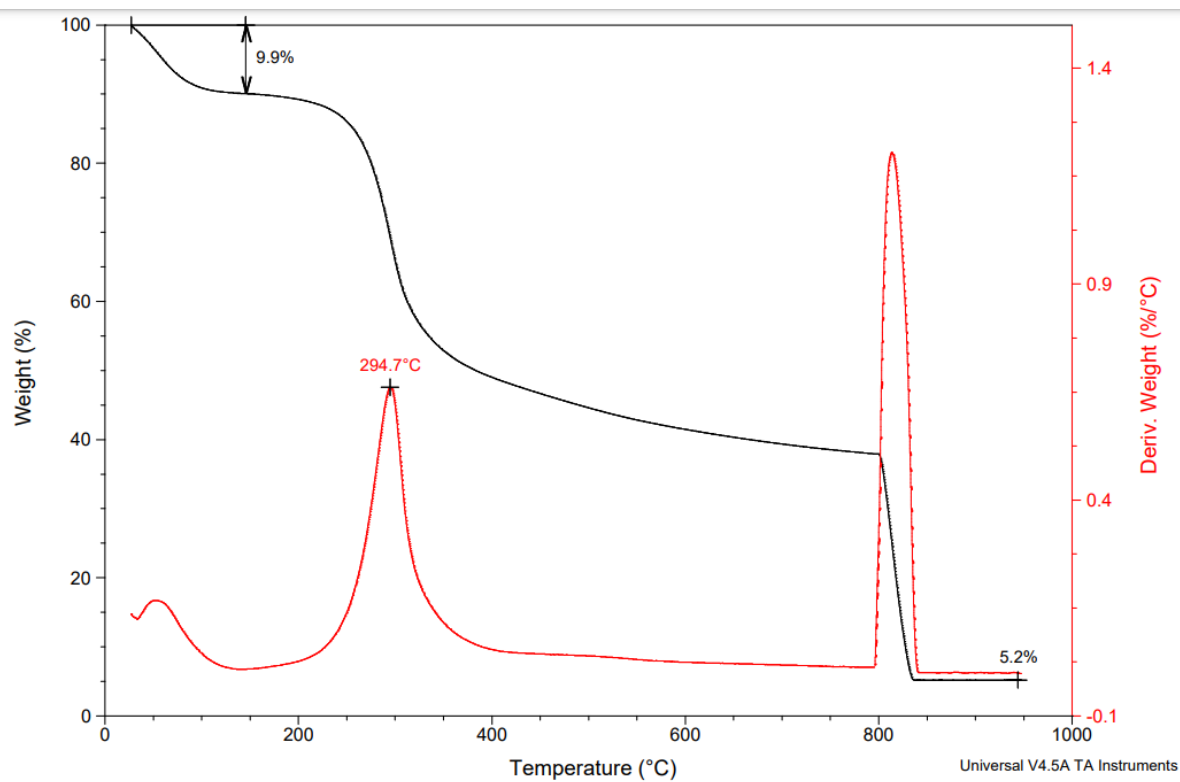

Figure S20 : Thermogravimetric and differential thermal analysis of under nitrogen (till 800°C) then air (800-950°C) of CHI-4.

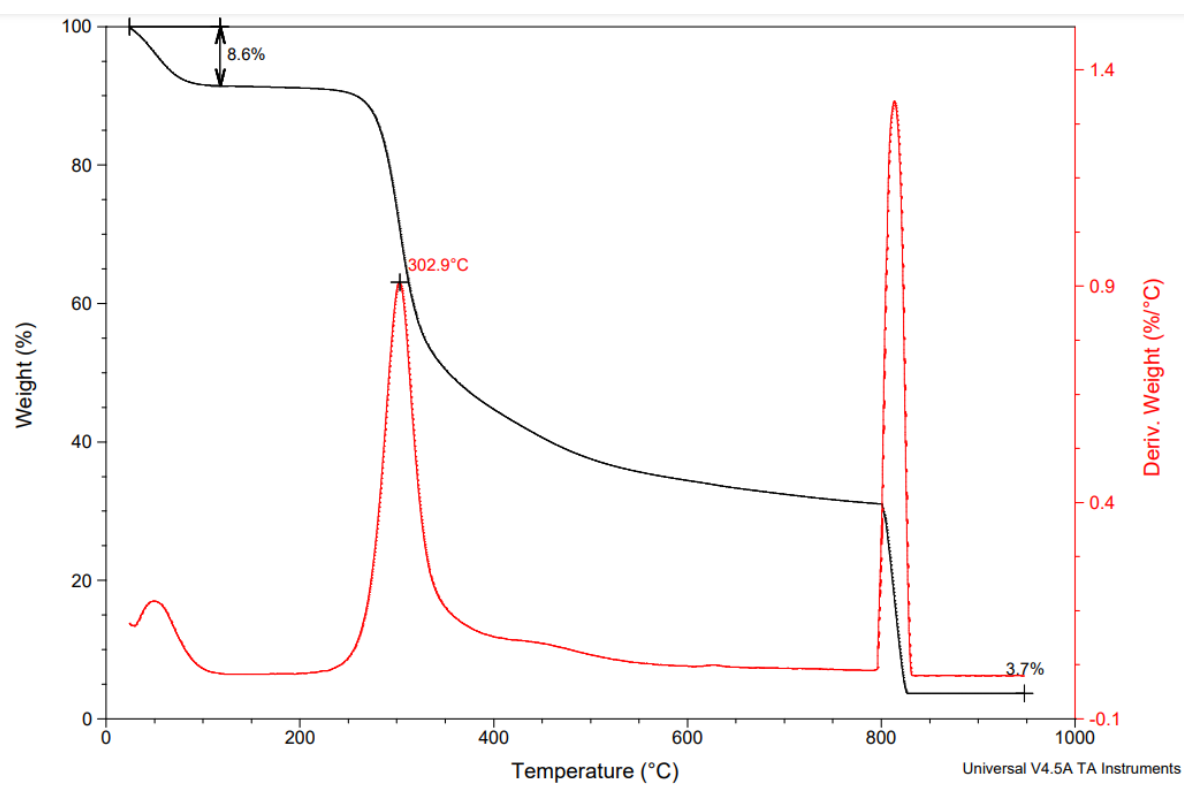

Figure S21 : Thermogravimetric and differential thermal analysis of under nitrogen (till 800°C) then air (800-950°C) of CHI-5.

## Electrospray

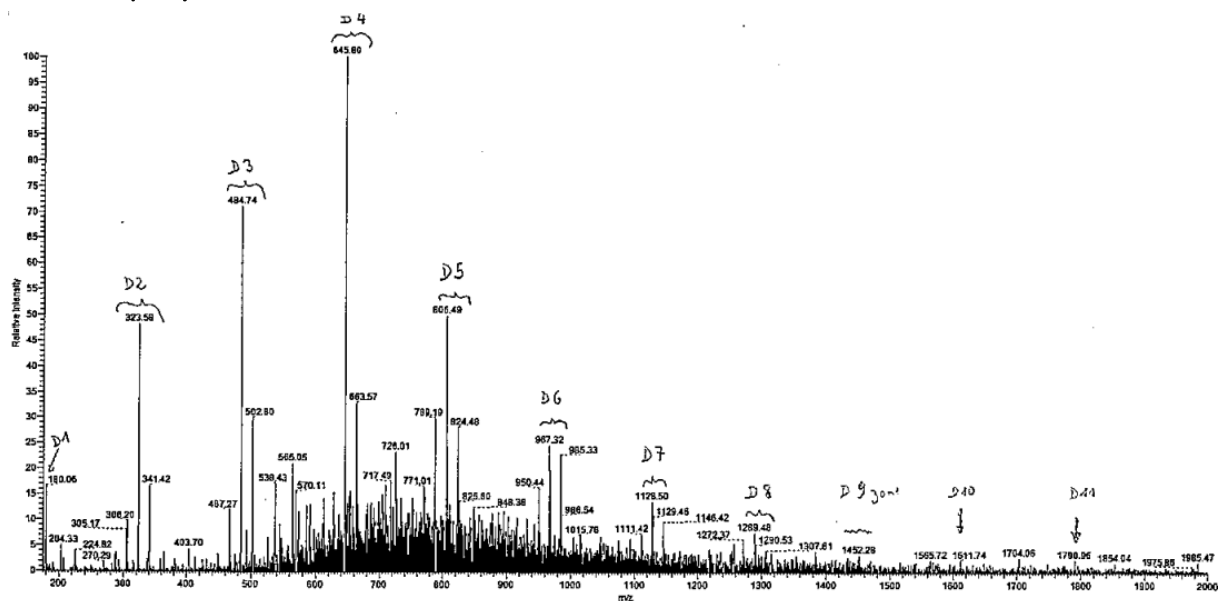

Figure S22 : Electrospray (+) mass spectrum of CHI-2

## MALDI-TOF

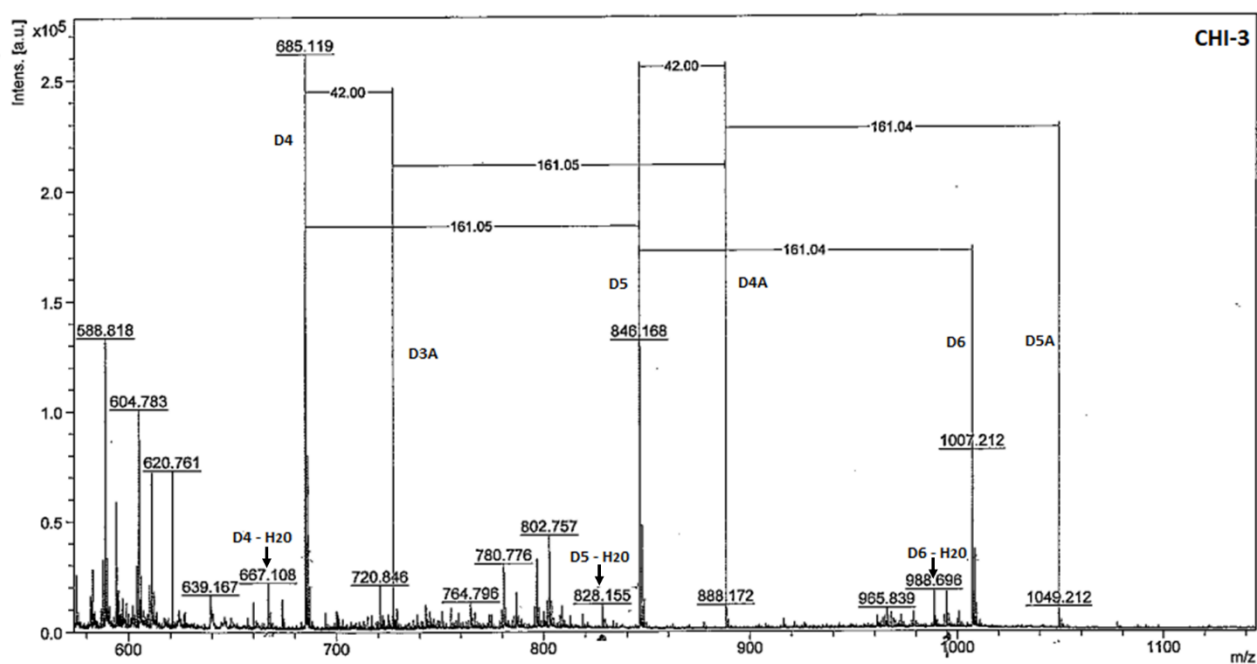

Figure S23 : MALDI-TOF (+) mass spectrum of CHI-3 (reflectron mode)

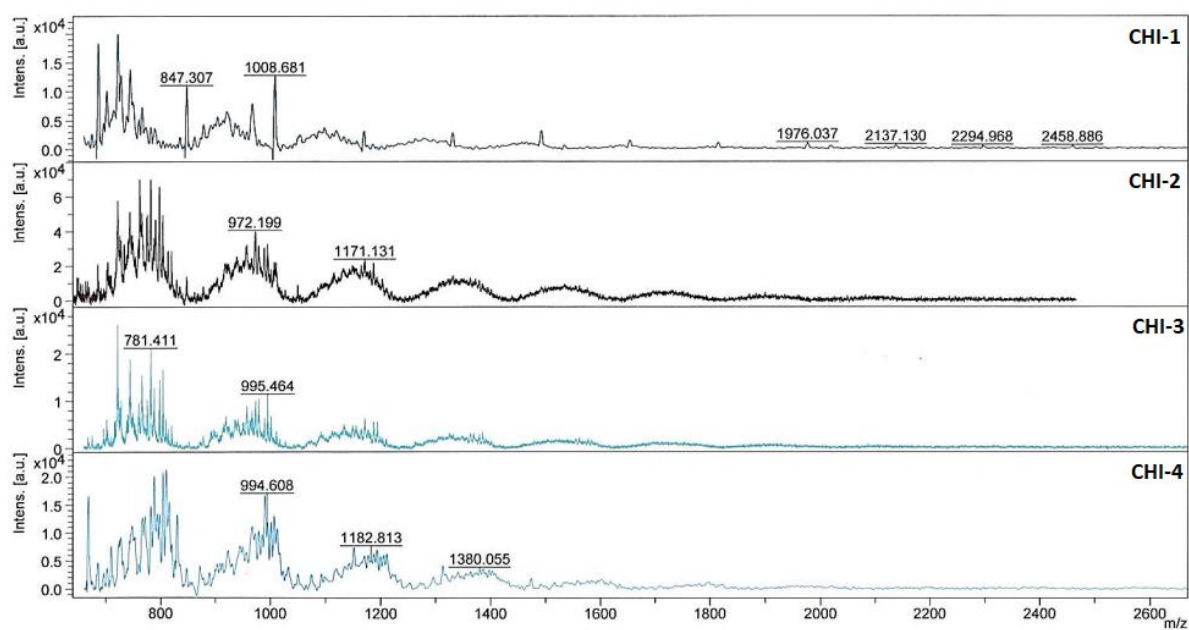

Figure S24 : MALDI-TOF (+) mass spectra of CHI-1 to CHI-4 (linear mode)

## Pyrograms

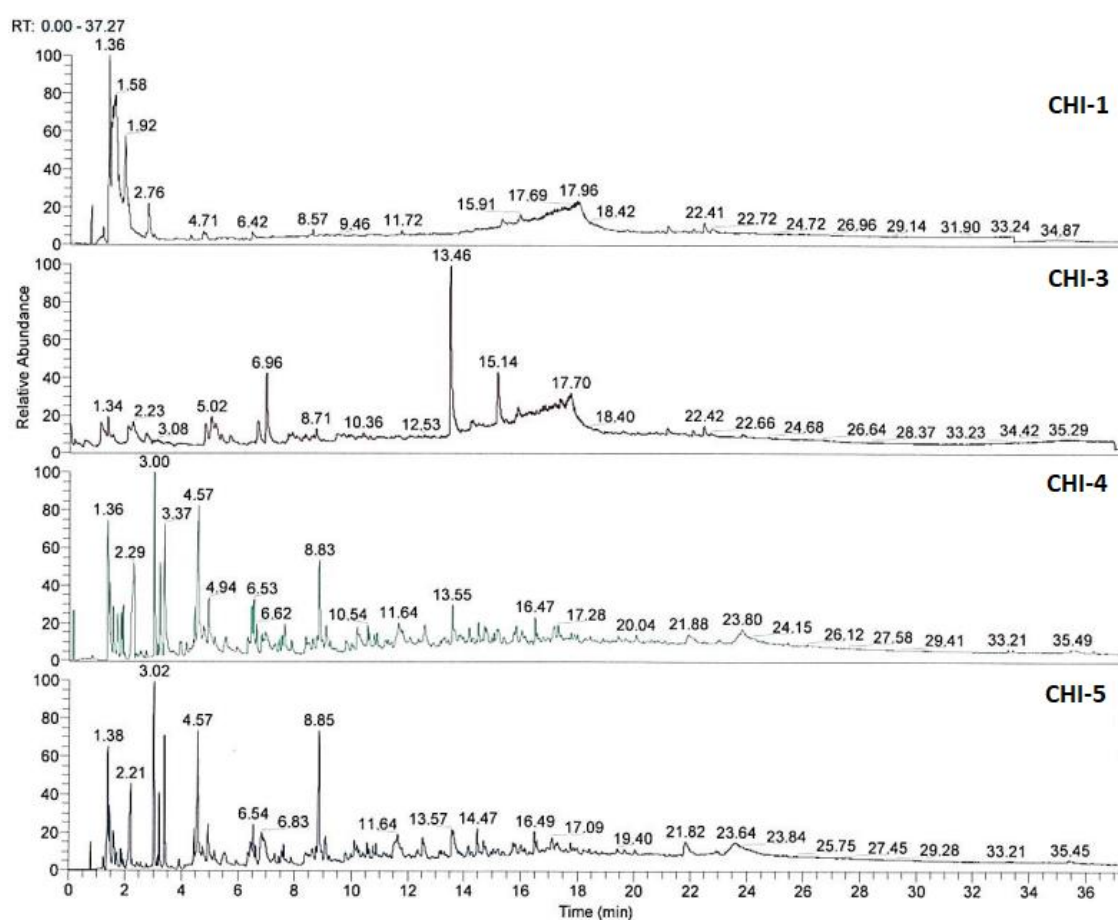

Figure S25 : Py-GC/MS of CHI-1, CHI-3, CHI-4 and CHI-5.

| NIST proposal                                                         | Retention time t <sub>R</sub> (min) |       |       |       |       | References    |
|-----------------------------------------------------------------------|-------------------------------------|-------|-------|-------|-------|---------------|
|                                                                       | CHI1                                | CHI-2 | CHI-3 | CHI-4 | CHI-5 |               |
| Carbone dioxide                                                       | 1.36                                | 1.21  | 1.34  | 1.36  | 1.38  | g,h           |
| Hydrogen chloride                                                     | 1.58                                | 1.23  | -     | -     | -     | j             |
| 2-Methylfuran                                                         | 1.92                                | 1.78  | -     | 1.91  | -     | b,h,i,j,l     |
| Acetic acid                                                           | -                                   | -     | -     | 2.29  | 2.21  |               |
| 2,5-Dimethylfuran                                                     | 2.76                                | 2.62  | -     | 2.73  | 2.74  | h             |
| Pyrazine                                                              | -                                   | -     | -     | 3.00  | 3.02  | b,c,d,f,h     |
| Pyridine                                                              | -                                   | -     | -     | 3.19  | 3.21  | c,d,f,h,j,l   |
|                                                                       |                                     |       |       |       |       |               |
| Pyrrole                                                               | -                                   | -     | -     | 3.37  | 3.39  | f,h,j,l       |
| 2- or 3-Methylpyridine                                                | -                                   | -     | -     | 4.46  | 4.46  | c,l           |
| Methylpyrazine                                                        | -                                   | -     | -     | 4.57  | 4.57  | a,b,c,d,e,f,h |
| 2-cyclopentene-1-one                                                  | -                                   | -     | -     | 4.78  | 4.75  | h,l           |
| 2-Methyl-(1H)-pyrrole                                                 | -                                   | -     | -     | 4.94  | 4.95  | h             |
| 3-Methyl-(1H)-pyrrole                                                 | -                                   | -     | -     | 5.16  | 5.17  | f,h,j,l       |
| 2-Methyl-2-cyclopentene-1-one                                         | 6.42                                | 6.25  | -     | 6.33  | 6.34  | h,j           |
| 2-(5H)-Furanone                                                       | -                                   | -     | -     | 6.46  | 6.44  | h             |
| Ethyl pyrazine                                                        | -                                   | -     | -     | 6.53  | 6.54  | b,c,d,e,f,h   |
| 2,3-Dimethylpyrazine                                                  | -                                   | -     | -     | 6.62  | 6.62  | a,b,c,d       |
| 2,4-Dimethyl-(1H)-pyrrole                                             | -                                   | -     | -     | 6.80  | -     | h             |
| 6-Methyl-4-(1H)-pyrimidinone                                          | -                                   | 7.74  | -     | 7.86  | 7.87  | l             |
| 2-Ethyl-5-methyl-pyrazine                                             | -                                   | -     | -     | 8.36  | 8.38  | c             |
| Acetylpyrazine                                                        | -                                   | -     | -     | 8.83  | 8.85  | b,d,f,h       |
| 2,3-Dimethylcyclopentene-1-one                                        | -                                   | -     | -     | 9.21  | 9.20  | l             |
| Acetylpyrrole                                                         | -                                   | -     | -     | 9.78  | 9.80  | c,d,e         |
| Indol-5-ol                                                            | -                                   | -     | -     | 10.54 | 10.56 |               |
| Dimethyl-2-pyrrole carbonitrile                                       | -                                   | -     | -     | 10.60 | 10.62 |               |
| 1-(5-Methylpyrazinyl)-1-ethanone                                      | -                                   | -     | -     | 10.79 | 10.81 |               |
| Acetyl-6-methylpyrazine                                               | -                                   | -     | -     | 10.87 | 10.89 |               |
| Pyridine-3-ol                                                         | -                                   | -     | -     | 11.64 | 11.66 | k             |
| 1H-Pyrrolo[2,3-b]-pyridine                                            | -                                   | -     | -     | 12.57 | 12.59 |               |
| 4-Hydroxy-(1,7/1,8)-naphthyridine<br>RN: 54569-29-8<br>RN: 54920-82-0 | -                                   | 13.52 | 13.46 | 13.57 | 13.59 |               |
| Indole                                                                | -                                   | -     | -     | 14.15 | 14.17 | j             |
| 2-Acetamino-5-methyl-imidazole                                        | -                                   | -     | -     | 14.48 | 14.50 | h,l           |
| 5-Methylbenzimidazole                                                 | -                                   | -     | -     | 14.70 | 14.72 |               |
| 4-Aminobenzyl cyanide                                                 | -                                   | -     | -     | 14.76 | 14.78 |               |
| 4-Methyl-naphthyridine                                                | -                                   | -     | -     | 14.95 | 14.97 |               |
| 3-Acetoxy-2(1H)-pyridone                                              | -                                   | -     | -     | 15.03 | 15.03 |               |
| Amino-4-hydroxyquinoline                                              | -                                   | -     | -     | 15.12 | 15.14 |               |
| 2-Hydroxy-7-methyl-1,8-naphthyridine                                  | -                                   | 15.17 | 15.14 | 15.18 | 15.20 |               |
| 2,4,6-Trimethyl-benzonitrile                                          | -                                   | -     | -     | 15.72 | 15.74 |               |
| 7-Methyl-1H-indole                                                    | -                                   | -     | 15.86 | 15.81 | 15.83 |               |
| 3-(1H-Pyrazol-4-yl)-pyridine                                          | -                                   | -     | -     | 16.47 | -     |               |

Table S2: Identified compounds generated by the pyrolysis of chitosans CHI-1 to CHI-5



- (a) D. Knorr, T.P. Wampler & R.A. Teutonico (1985). Formation of pyrazines by chitin pyrolysis. *Journal of Food Science*, 50, 1762-1763. Doi: 10.1111/j.1365-2621.tb10589.x
- (b) C.-K. Shu (1998). Degradation products formed from glucosamine in water. *Journal of Agricultural and Food Chemistry*, 46, 1129-1131. Doi: 10.1021/jf970812n
- (c) J. Chen & C.-T. Ho (1998). Volatile compounds formed from thermal degradation of glucosamine in a dry system. *Journal of Agricultural and Food Chemistry*, 46, 1971-1974. Doi: 10.1021/jf971021o
- (d) J. Chen, M. Wang & C.-T. Ho (1998). Volatile compounds generated from thermal degradation of *N*-acetylglucosamine. *Journal of Agricultural and Food Chemistry*, 46, 3207-3209. Doi: 10.1021/jf980129g
- (e) L. Zeng, C. Qin, L. Wang & W. Li (2011). Volatile compounds formed by pyrolysis of chitosan. *Carbohydrate Polymers*, 83, 1553-1557. Doi: 10.1016/j.carbpol.2010.10.007
- (f) I. Corazzari, R. Nistico, F. Turci, M.G. Faga, F. Fransozo, S. Tabasso, G. Magnacca (2015). Advanced physico-chemical characterization of chitosan with FTIR and GCMS: Thermal degradation and water adsorption capacity. *Polymer Degradation and Stability*, 112, 1-9. Doi: 10.1016/j.polymdegradstab.2014.12.006.
- (g) Y. Qiao, S. Chen, Y. Liu, H. Sun, S. Jia, J. Shi, C.M. Pedersen, Y. Wang, & X. Hou (2015). Pyrolysis of chitin biomass: TG-MS analysis and solid char residue characterization. *Carbohydrate Polymers*, 133, 163-170. Doi: 10.1016/j.carbpol.2015.07.005.
- (h) C. Liu, H. Zhang, R. Xiao & S. Wu (2017). Value-added organonitrogen chemicals evolution from the pyrolysis of chitin and chitosan. *Carbohydrate Polymers*, 156, 118-124. Doi: 10.1016/j.carbpol.2016.09.024.
- (i) H.F.G. Barbosa, D.S. Francisco, A.P.G. Ferreira & E.T.G. Cavaleiro (2019). A new look towards the thermal decomposition of chitins and chitosans with different degrees of deacetylation by coupled TG-FTIR. *Carbohydrate Polymers*, 225, 115232. Doi: 10.1016/j.carbpol.2019.115232.
- (j) P. Zhang, H. Hu, H. Tang, Y. Yang, H. Liu, Q. Lu, X. Li, N. Worasuwannarak & H. Yao (2019). In-depth experimental study of pyrolysis characteristics of raw and cooking treated shrimp shell samples. *Renewable Energy*, 139, 730-738. Doi: 10.1016/j.renene.2019.02.119.
- (k) M. Nikahd, J. Mikusek, L.-J. Yu, M.L. Coote, M.G. Banwell, C. Ma & M.G. Gardiner (2020). Exploiting chitin as a source of biologically fixed nitrogen: Formation and full characterization of small-molecule hetero- and carbocyclic pyrolysis products. *The Journal of Organic Chemistry*, 85, 4583-4593. Doi: 10.1021/acs.joc.9b03438.
- (l) P. Wang & Y. Shen (2022). Catalytic pyrolysis of cellulose and chitin with calcinated dolomite – Pyrolysis kinetics and products analysis. *Fuel*, 312, 122875. Doi: 10.1016/j.fuel.2021.122875.

## Bioactivity

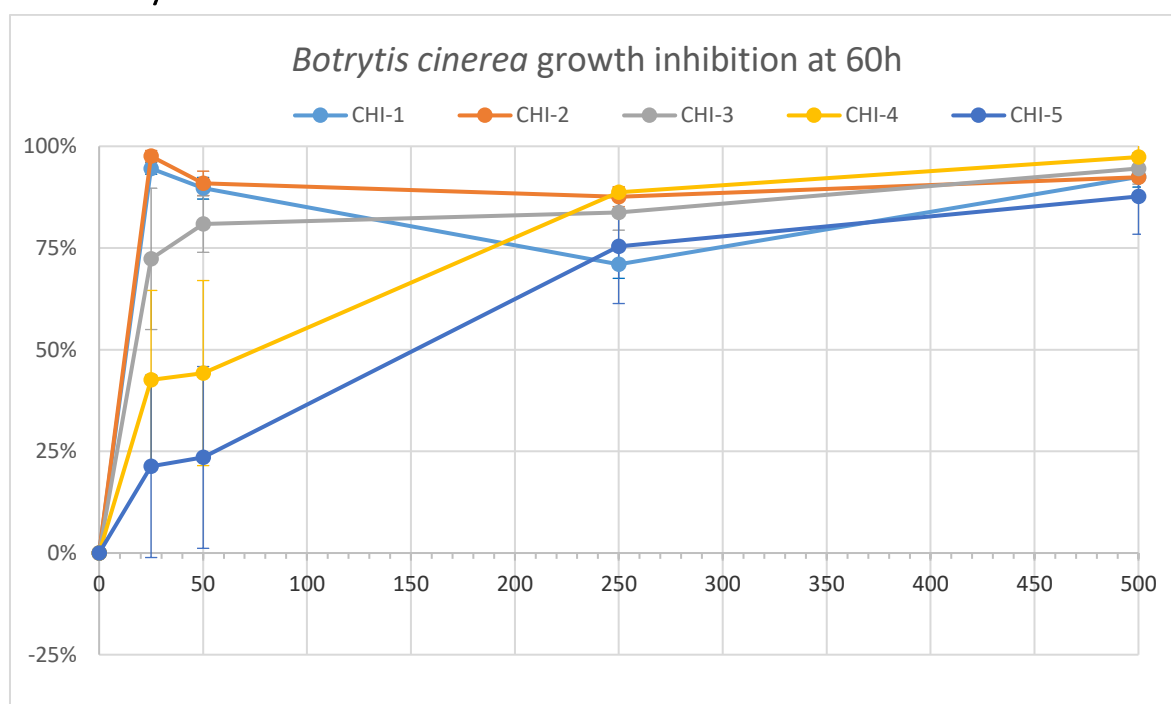

Figure S26 : Growth inhibition of *Botrytis cinerea* *in vitro* after CHI-1 to -5 treatment. *B. cinerea* conidia ( $2.10^5$ /mL) were treated with various concentrations of CHI-1 to CHI-5 (25, 50, 250 and 500 mg/L) and mycelial growth was followed by optical density at 492 nm measured by the microplate reader Bioscreener up to 60 hpt. Values represent the mean of three independent experiments  $\pm$  SE (n=9).
